# Supplementary material
Source: publisher figshare collection journal article supplement (https://tandf.figshare.com/articles/dataset/_/5769291)
Supplement: Supplementary file 2 [file 2]

Archive with 2 entries (2 files):
- kaup_a_1422851_sm9056.pdf
- kaup_a_1422851_sm0166.xlsx
