# Supplementary material
Source: publisher figshare collection journal article supplement (https://tandf.figshare.com/articles/dataset/_/5769291)
Supplement: Supplementary file 2 [file 2 › kaup_a_1422851_sm0166.xlsx]

## Sheet: BECN1
Images Pasted from PEAKS Studio v8: Tandem MS for BECN1 Peptide, Theoeretical Fragment Ion Table and BECN1 peptides detected by PEAKS
Note 1: Not all fragment ion types are shown in the spectrum. Also, some fragment ion types are not included in the table.
See Figure S1 for further fragment ion assignments.
Note 2: b2 ion m/z = 229.17 (experimental).
Note 3: Fragment ion mass errors range from -0.8 to 0.8 Da as expected for low resolution ion trap mass measurements.
Note 4: The reported peptide mass error for LDTS(Phospho)FKILDR from the PEAKS Studio report is -2.4 ppm.
Note 5: Fragment ion masses shown in Red and Blue on the Ion Match table are experimental values.
Note 6: Fragment ion masses shown in black on the Ion Match table are [unobserved] monoisotopic values.
